# Supplementary material for: Impact of Landscape on Host–Parasite Genetic Diversity and Distribution Using the Puumala orthohantavirus–Bank Vole System
Source: MDPI journal article supplement (doi:10.3390/microorganisms9071516), 2021-07-15
Supplement: s1 [file s1]

## Supplementary Materials

**Table S1.** Negative and positive selected sites for the Ardennes Puumala virus (PUUV) strains. SLAC: Single-Likelihood Ancestor Counting; FEL: Fixed-Effects Likelihood; MEME: Mixed Effects Model of Evolution; FUBAR: Fast Unbiased Approximate Bayesian; aBSREL: adaptive Branch-Site Random Effects Likelihood; BUSTED: Branch-site Unrestricted Statistical Test for Episodic Diversification.

|                                                     | Evolutionary test | S segment                    | M segment                    | L segment                    |
|-----------------------------------------------------|-------------------|------------------------------|------------------------------|------------------------------|
| No. of unique sequences                             |                   | 30                           | 14                           | 12                           |
| No. of codons analyzed                              |                   | 433                          | 151                          | 137                          |
| No. of codons under negative/purifying selection    | FEL               | 79*                          | 35*                          | 29*                          |
|                                                     | SLAC              | 18*                          | 3*                           | 2*                           |
|                                                     | FUBAR             | 153**                        | 37**                         | 24**                         |
| No. of codons under positive/diversifying selection | FEL               | 0*                           | 0*                           | 0*                           |
|                                                     | SLAC              | 0*                           | 0*                           | 0*                           |
|                                                     | MEME              | 0*                           | 0*                           | 0*                           |
|                                                     | FUBAR             | 1**                          | 0**                          | 0**                          |
|                                                     | aBSREL            | 0***<br>(57 branches tested) | 0***<br>(25 branches tested) | 0***<br>(21 branches tested) |
|                                                     | BUSTED            | 0***                         | 0***                         | 0***                         |

\*  $p$ -value = 0.1; \*\* posterior probability = 0.9; \*\*\*  $p$ -value  $\leq 0.05$ ;  $p$ -value  $\geq 0.05$ .

**Table S2.** Puumala virus (PUUV) prevalence and genetic diversity of vole populations in the ten sites from the French Ardennes.

| Sites          | N (Trapping year) | PUUV prev. (%) | A     | H <sub>0</sub> | H <sub>E</sub> | F <sub>IS</sub> | F <sub>ST</sub> |
|----------------|-------------------|----------------|-------|----------------|----------------|-----------------|-----------------|
| Hargnies       | 34 (2008)         | 29.4           | 11.38 | 0.858          | 0.898          | 0.046 *         | 0.011           |
| Woiries        | 37 (2008)         | 8.1            | 10.29 | 0.847          | 0.875          | 0.032 *         | 0.025           |
| Renwez         | 38 (2008)         | 13.2           | 10.57 | 0.857          | 0.876          | 0.022           | 0.024           |
| Cliron         | 34 (2008)         | 5.9            | 09.82 | 0.785          | 0.866          | 0.093 *         | 0.046           |
| Elan           | 27 (2008)         | 7.4            | 10.48 | 0.833          | 0.879          | 0.053 *         | 0.025           |
| Cassine        | 27 (2008)         | 18.5           | 10.55 | 0.823          | 0.883          | 0.069 *         | 0.020           |
| Sauville       | 47 (2008)         | 0              | 10.44 | 0.832          | 0.867          | 0.052 *         | 0.045           |
| Croix-aux-Bois | 31 (2008)         | 9.7            | 11.05 | 0.840          | 0.885          | 0.040 *         | 0.019           |
| Boult-aux-Bois | 16 (2010)         | 12.5           | 09.09 | 0.850          | 0.845          | -0.006          | 0.056           |
| Briquenay      | 22 (2008)         | 0              | 09.77 | 0.837          | 0.877          | 0.047 *         | 0.027           |

N = number of bank voles trapped; A = allelic richness corrected for sample size; H<sub>0</sub> = average heterozygosity; H<sub>E</sub> = average expected heterozygosity; F<sub>IS</sub> = the genetic isolation estimated by local F<sub>ST</sub> values; F<sub>ST</sub> = the degree of gene differentiation among populations in terms of allele frequencies. \* significant departures from Hardy-Weinberg equilibrium.

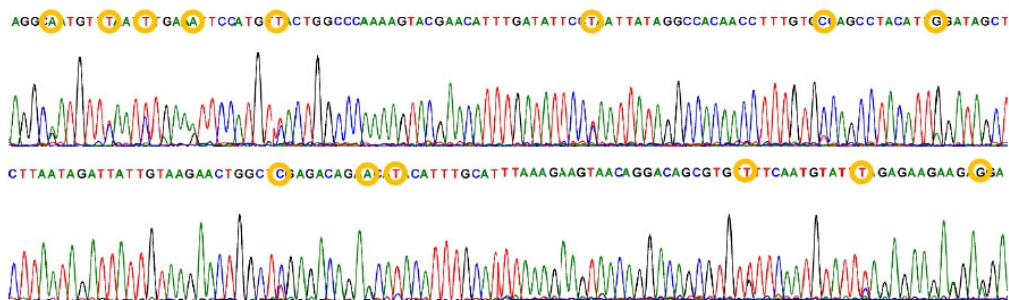

**Figure S1.** Chromatogram of the Woires\_58 Puumala virus (PUUV) strain. Picture shows nucleotides from 659 to 860 nt of the L genome segment.

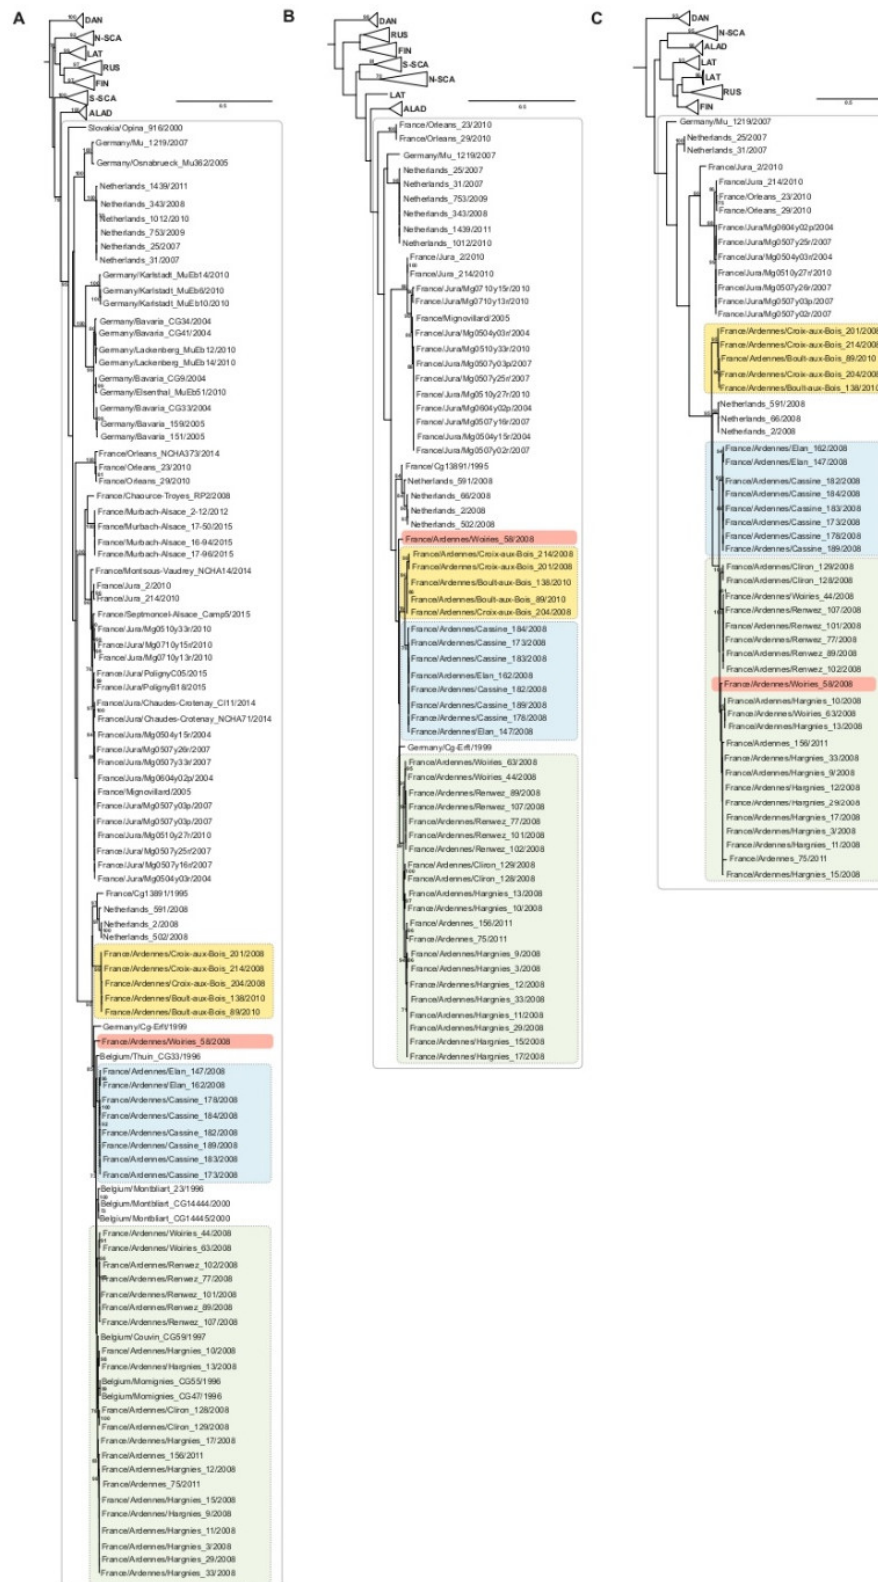

**Figure S2.** Phylogenetic trees. Maximum likelihood and Bayesian trees calculated for the S, M and L segment sequences of PUUV: (A) partial S (1–1299 nt); (B) partial M (2180–2632 nt); (C) partial L (577–987 nt). A maximum clade credibility trees are presented with nonparametric bootstrap support values (>70%) shown on nodes. The strains HNTV, ANDV, SNV and TULV were used as outgroups, nonetheless, for the simplification of the graphic they are not included in this figure.
